# Supplementary material
Source: Frontiers journal article supplement (https://www.frontiersin.org/articles/320437)
Supplement: Presentation_4.PDF [file Presentation_4.PDF]

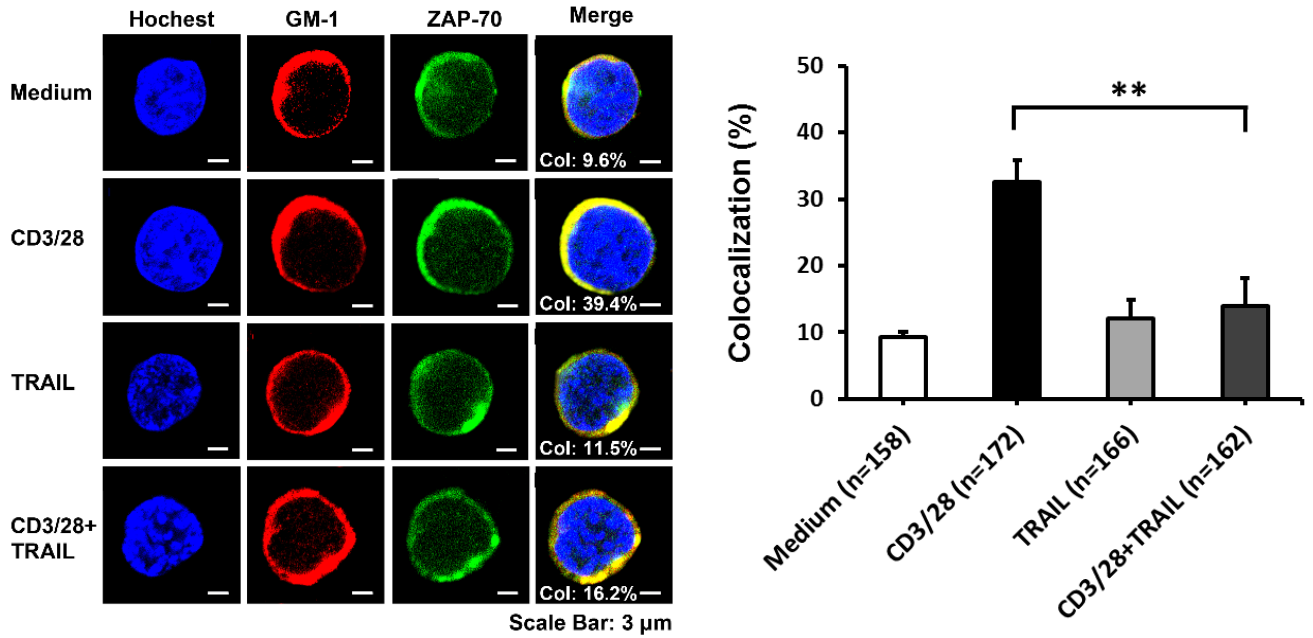

**Figure S4. TRAIL inhibited recruitment of ZAP70 into lipid raft in activated T cells.**

$2 \times 10^6$  primary  $\text{CD4}^+$  T cells from C57BL/6 mice were stimulated for 24 h with medium, anti-CD3/anti-CD28 Abs, TRAIL or combination of anti-CD3/anti-CD28 Abs and TRAIL. Cells were fixed, permeabilized, and processed for immunofluorescence staining of an anti-ZAP70 Ab (green), cholera toxin B subunit for GM1 (red), and Hoechst 33258 (blue). After staining, cells were plated and examined by Zeiss LSM-880 laser scanning confocal microscope (Carl Zeiss). Scale bars, 3  $\mu\text{m}$ . Images for ratio of colocalization were processed and analyzed by ZEN 2 (Carl Zeiss). Data were means  $\pm$  s.d. of triplicate samples. \*\*  $p < 0.01$  by non-parametric Mann-Whitney U test.
